# Supplementary material for: Structures of outer-arm dynein array on microtubule doublet reveal a motor coordination mechanism
Source: PubMed Central journal article supplement (PMC8500839; doi:10.1038/s41594-021-00656-9), 2021-09-23
Supplement: 41594_2021_656_MOESM1_ESM.pdf [file 41594_2021_656_MOESM1_ESM.pdf]

**Supplementary information**

---

**Structures of outer-arm dynein array on microtubule doublet reveal a motor coordination mechanism**

---

In the format provided by the authors and unedited

**Supplementary information**

---

**Structures of outer-arm dynein array on microtubule doublet reveal a motor coordination mechanism**

---

In the format provided by the authors and unedited

**Supplementary Table 1: A summary of OAD subunits.**

| Subunit name (this paper)          | Gene Model Identifier | TGD standard name | MW (KDa) | Uniprot ID | MS (significant matches) | Orthologues in <i>C.reinhardtii</i> (Uniprot ID) |
|------------------------------------|-----------------------|-------------------|----------|------------|--------------------------|--------------------------------------------------|
| <b><math>\alpha</math>-HC</b>      | TTHERM_01276420       | <b>DYH3</b>       | 534      | Q22A67     | 1598                     | <b><math>\gamma</math>-HC</b> (Q39575)           |
| <b><math>\beta</math>-HC</b>       | TTHERM_00499300       | <b>DYH4</b>       | 530      | I7M9J2     | 1635                     | <b><math>\beta</math>-HC</b> (Q39565)            |
| <b><math>\gamma</math>-HC</b>      | TTHERM_00486600       | <b>DYH5</b>       | 475      | I7M6H4     | 1518                     | <b><math>\alpha</math>-HC</b> (Q39610)           |
| <b>IC2</b>                         | TTHERM_00487150       | <b>DIC2</b>       | 78       | I7M008     | 280                      | <b>IC1</b> (Q39578)                              |
| <b>IC3</b>                         | TTHERM_00079230       | <b>DIC3</b>       | 77       | Q23FU1     | 397                      | <b>IC2</b> (P27766)                              |
| <b>LC7-a</b>                       | TTHERM_00348650       | N/A               | 15       | I7MHB1     | 72                       | <b>LC7a</b> (AAD45881)                           |
| <b>LC7-b</b>                       | TTHERM_00030210       | <b>LC7B</b>       | 12       | Q22MV2     | 73                       | <b>LC7b</b> (EDP03034)                           |
| <b>LC8-1b</b>                      | TTHERM_00716250       | <b>LC10</b>       | 12       | I7MCM8     | 25                       | <b>LC10</b> (EDP00562)                           |
| <b>LC8-1a</b>                      | TTHERM_00449029       | <b>DLC82</b>      | 11       | A4VE64     | 37                       | <b>LC8</b> (Q39580)                              |
| <b>LC8-2b</b>                      | TTHERM_00023950       | N/A               | 12       | Q22R86     | 29                       |                                                  |
| <b>LC8-2a</b>                      | TTHERM_00971840       | <b>LC8E</b>       | 11       | Q24DI9     | 15                       |                                                  |
| <b>LC8-3b</b>                      | TTHERM_000442909      | N/A               | 13       | W7XJB1     | 36                       |                                                  |
| <b>LC8-3a</b>                      | TTHERM_01079060       | N/A               | 10       | Q24CE5     | 39                       |                                                  |
| <b>Tctex-a</b>                     | TTHERM_00392979       | N/A               | 13       | A4VEB3     | 16                       | <b>LC9</b> (DAAZ95589)                           |
| <b>Tctex-b</b>                     | N/A                   | N/A               | 14       | Q1HGH8     | 22                       |                                                  |
| <b>LC3BL</b>                       | TTHERM_00149859       | N/A               | 13       | A4VD75     | 44                       | <b>LC3</b> (Q39592)                              |
| <b>LC1</b>                         | TTHERM_00334290       | <b>LC1</b>        | 22       | I7M1N7     | 88                       | <b>LC1</b> (AAD41040)                            |
| <b>LC4A</b>                        | TTHERM_01075620       | <b>LC4A</b>       | 18       | Q22C78     | 21                       | <b>LC4</b> (Q39584)                              |
| <b><math>\alpha</math>-tubulin</b> | TTHERM_00558620       | <b>ATU1</b>       | 49       | I7M9N6     | 7                        | <b>TUA1</b> (Q540H1)                             |
| <b><math>\beta</math>-tubulin</b>  | TTHERM_00836580       | <b>BTU2</b>       | 49       | Q24B92     | 11                       | <b>TUB1</b> (A8IXZ0)                             |
