# Supplementary material for: Structures of outer-arm dynein array on microtubule doublet reveal a motor coordination mechanism
Source: PubMed Central journal article supplement (PMC8500839; doi:10.1038/s41594-021-00656-9), 2021-09-23

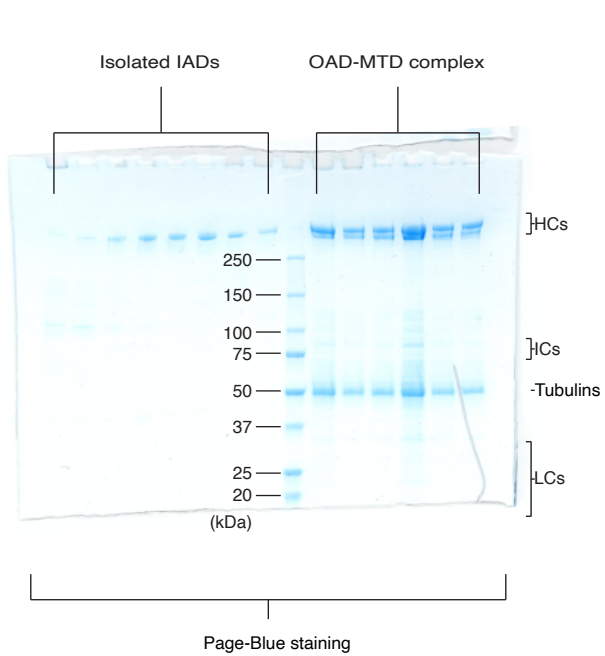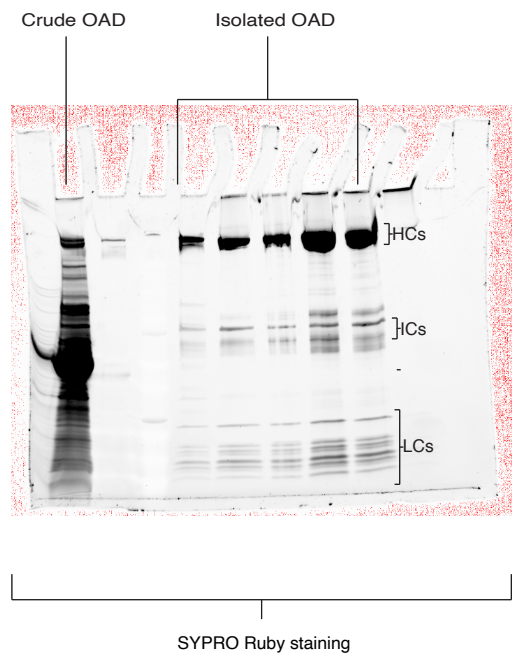

Supplement: 41594_2021_656_MOESM7_ESM.pdf [file 41594_2021_656_MOESM7_ESM.pdf]
